# Supplementary material
Source: Springer Nature journal article supplement (https://www.springermedizin.de/resource/supplementary/12943_2012_1075_MOESM3_ESM.pdf/9552492)

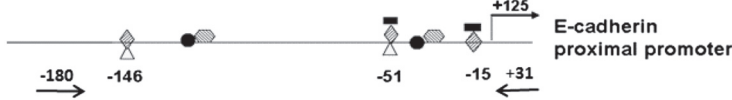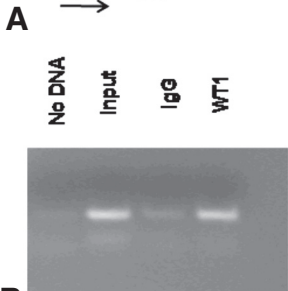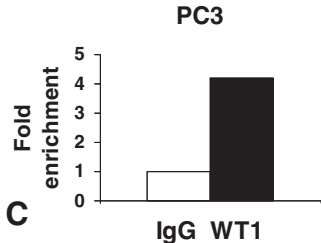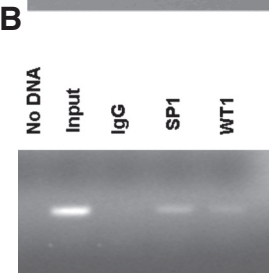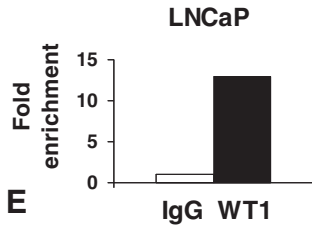

Supplement: MOESM3 [file 9552492]
